# Supplementary material for: Effects of individual variation and seasonal vaccination on disease risks
Source: Research Square preprint supplement (doi:10.21203/rs.3.rs-6193835/v1), 2025-04-03
Supplement: Supplementary file 3 [file bb40ba570db28156ea10fce3.pdf]

**Extended Data Table**

| Parameter | Description                                                                | Population value                  | Standard deviation of random effect |
|-----------|----------------------------------------------------------------------------|-----------------------------------|-------------------------------------|
| $H$       | Maximum antibody production rate                                           | 6,090 AU/mL                       | 0.697                               |
| $m$       | Steepness parameter of antibody production response to mRNA                | 0.0176                            | 0.369                               |
| $K$       | mRNA amount at which antibody production rate takes half its maximum value | 28,100 $\mu\text{g}/0.5\text{mL}$ | 0                                   |
| $\mu$     | Antibody decay rate                                                        | 0.875 $\text{day}^{-1}$           | 0                                   |
| $\tau_d$  | Delay before induction of antibody response                                | 4.09 days                         | 0                                   |
| $D$       | mRNA dose                                                                  | 100 $\mu\text{g}/0.5\text{mL}$    | 0                                   |
| $\delta$  | mRNA decay rate                                                            | 0.693 $\text{day}^{-1}$           | 0                                   |

**2 Extended Data Table 1. Population values and random effect parameters for individual**

3 **antibody model parameters.** We assumed individual values of each parameter,  $\theta \in$

4  $\{H, m, K, \mu, \tau_d, D, \delta\}$ , of the antibody dynamics model (equations 7-8 in the main text) to be distributed

5 as  $\theta = \theta_{pop} \exp(\omega_\theta \varepsilon_\theta)$ , where  $\theta_{pop}$  is the population median value,  $\omega_\theta$  is the standard deviation of the

6 random effect, and  $\varepsilon_\theta$  is a random variate drawn from a normal distribution with mean zero and

7 standard deviation one. For each such parameter,  $\theta$ , the values of  $\log(\theta_{pop})$  and  $\omega_\theta$  were taken to be

8 the mean and standard deviation between individuals, respectively, of the natural logarithm of the

9 individual parameter estimates obtained in (5). Specifically, in (5), individual estimates of the

10 parameters  $H$  and  $m$  were obtained by fitting the antibody dynamics model to longitudinal data

11 collected from 1,618 individuals following booster vaccination. The parameters  $K, \mu$  and  $\tau_d$  were

12 assumed to take the specified fixed values in (5) based on separate parameter estimates obtained in

13 that study using more densely sampled data from 12 healthcare workers (with this estimation

14 indicating limited variability in these three parameters (5)), while the values of  $D$  and  $\delta$  were assumed

15 in that study (and we take the same values here).
